# Supplementary material
Source: PubMed Central journal article supplement (PMC3556791)
Supplement: NIHMS433994-supplement-Consent.pdf [file NIHMS433994-supplement-Consent.pdf]

The first author of the manuscript and the corresponding author (if different) certify on honor, on behalf of all co-authors, that they have been granted a permission to publish signed by the patient himself (or by his legal representatives) for each patient whose facial features are identifiable in the photographs illustrating this article. The authors maintain in their files a copy of this consent, which will be forwarded to Elsevier in case of complaints or legal proceedings.

Figures for which a signed consent has been obtained:

| Figure number | Figure number | Figure number | Figure number |
|---------------|---------------|---------------|---------------|
| Video 1       | Video 2       |               |               |
|               |               |               |               |
|               |               |               |               |

| ELECTRONIC SIGNATURE:                | Name    | Forename |
|--------------------------------------|---------|----------|
| First author OR Corresponding author | Filloux | Francis  |



December 30, 2011.

for: Filloux et al.

Occurrence and Clinical Features of Epileptic and Non-Epileptic Paroxysmal Events in Five Children with Pallister-Killian Syndrome.
